# Supplementary material
Source: publisher figshare collection journal article supplement (https://frontiersin.figshare.com/ndownloader/files/30805906)
Supplement: Supplementary file [file 30805906]

## Operational definitions

- Hypertension was considered in patients on antihypertensive medications or repeated blood pressure of 140/90mm Hg or higher.
- Diabetes mellitus was indicated if the patients had previous diagnosis or on antidiabetic medication or if one of the following criteria were recorded during hospital stay: fasting plasma glucose (FPG) test  $\geq 7.0$  mmol/l (126 mg/dl), or a random plasma glucose (RPG) test  $\geq 11.1$  mmol/L (200 mg/dL) with classic symptoms of hyperglycemia, or a Glycated hemoglobin (HbA1c) level  $\geq 6.5\%$ .
- Dyslipidemia was defined as total cholesterol  $\geq 200$  mg/dL, LDL-C  $\geq 100$  mg/dL, triglycerides  $\geq 150$  mg/dL, or HDL-C  $\leq 40$  mg/dL in males and  $\leq 50$  mg/dL in females.
- Myocardial infarction was defined as the presence of previous diagnosis MI irrespective of causes.
- Chronic kidney disease was defined as the presence of kidney damage or glomerular filtration rate (GFR)  $< 60$  mL/min/1.73 m<sup>2</sup> for 3 months or more, irrespective of cause.
- HIV/AIDS was indicated by previous diagnosis of HIV irrespective of antiretroviral treatment.
